# Supplementary material for: Citizen-Operated Low-Cost Sensors for Estimating Outdoor Particulate Matter Infiltration
Source: Research Square preprint supplement (doi:10.21203/rs.3.rs-4618450/v1), 2024-07-24
Supplement: Supplementary file 1 [file 2e02b78bebfe00b0841e3139.docx]

Supplementary Material

Citizen-Operated Low-Cost Sensors for Estimating Outdoor Particulate Matter Infiltration

Vasileios Salamalikis1,*, Amirhossein Hassani1, Paweł Zawadzki2, Sebastian Bykuć2, and Núria Castell1

1 The Climate and Environmental Research Institute NILU, P.O. Box 100, 2027 Kjeller, Norway

2 Institute of Fluid-Flow Machinery Polish Academy of Sciences, Fiszera 14, Gdańsk, 80231, Poland

*****Correspondence: [vsal@nilu.no](mailto:vsal@nilu.no); Orcid: <https://orcid.org/0000-0003-2683-062X>

Amirhossein Hassani: [ahas@nilu.no](mailto:ahas@nilu.no); Orcid: <https://orcid.org/0000-0002-6470-0490>

Paweł Zawadzki: pzawadzki@imp.gda.pl; Orcid:

Sebastian Bykuć: [sbykuc@imp.gda.pl](mailto:sbykuc@imp.gda.pl); Orcid: <https://orcid.org/0000-0001-8192-5432>

Núria Castell:[ncb@nilu.no](mailto:ncb@nilu.no); Orcid: <https://orcid.org/0000-0002-2312-8168>

Mass balance equation for indoor concentration and steady-state assumption

The indoor concentration of an air pollutant can be simply modeled using a simple mass balance equation as follows,

|  | (S1) |
| --- | --- |
|  | (S2) |

where dCin is the change in indoor PM2.5 concentration (μg m–3) during the time interval dt, Cin and Cout are the indoor and outdoor particle’s concentrations (μg m–3), t is the time (h), p is the penetration efficiency of particles (dimensionless), α is the air exchange rate (h–1), k is the deposition rate of particles (h–1), S is the indoor emission rate (μg h–1) and V is the volume of the building or the room (m3).

The steady state assumption, as shown in Eq. S2, holds when the indoor concentration change is negligible compared to the indoor concentration, dCin(t) << Cin(t) or Cin(t) – dCin(t) ≈ Cin(t). The following procedure is applied to determine the temporal window the indoor air pollutant reaches a steady state:

1. T-step running averages are calculated for Cin(t) and ΔCin(t) = Cin(t) – Cin(t–1) as <Cin(t)>T and <ΔCin(t)>T at various temporal intervals, T=1, 6, 12, 24, 48, 72 and 96 h. It is expected <Cin(t)> T – <ΔCin(t)>T ≈ <Cin(t)> T and the gain between <Cin(t)>T – <ΔCin(t)>T and <Cin(t)>T to be close to unity for larger temporal windows. Furthermore, the following metrics (Mean Absolute Diifference, MAD and Root Mean Square Difference, RMSD) are also computed as dispersion indicators,

|  | (S1) |
| --- | --- |
|  | (S2) |

1. The optimal temporal window is selected when error metrics are stabilized or show negligible changes.

The <> operator corresponds to the temporal average of a parameter over a given time period.

| 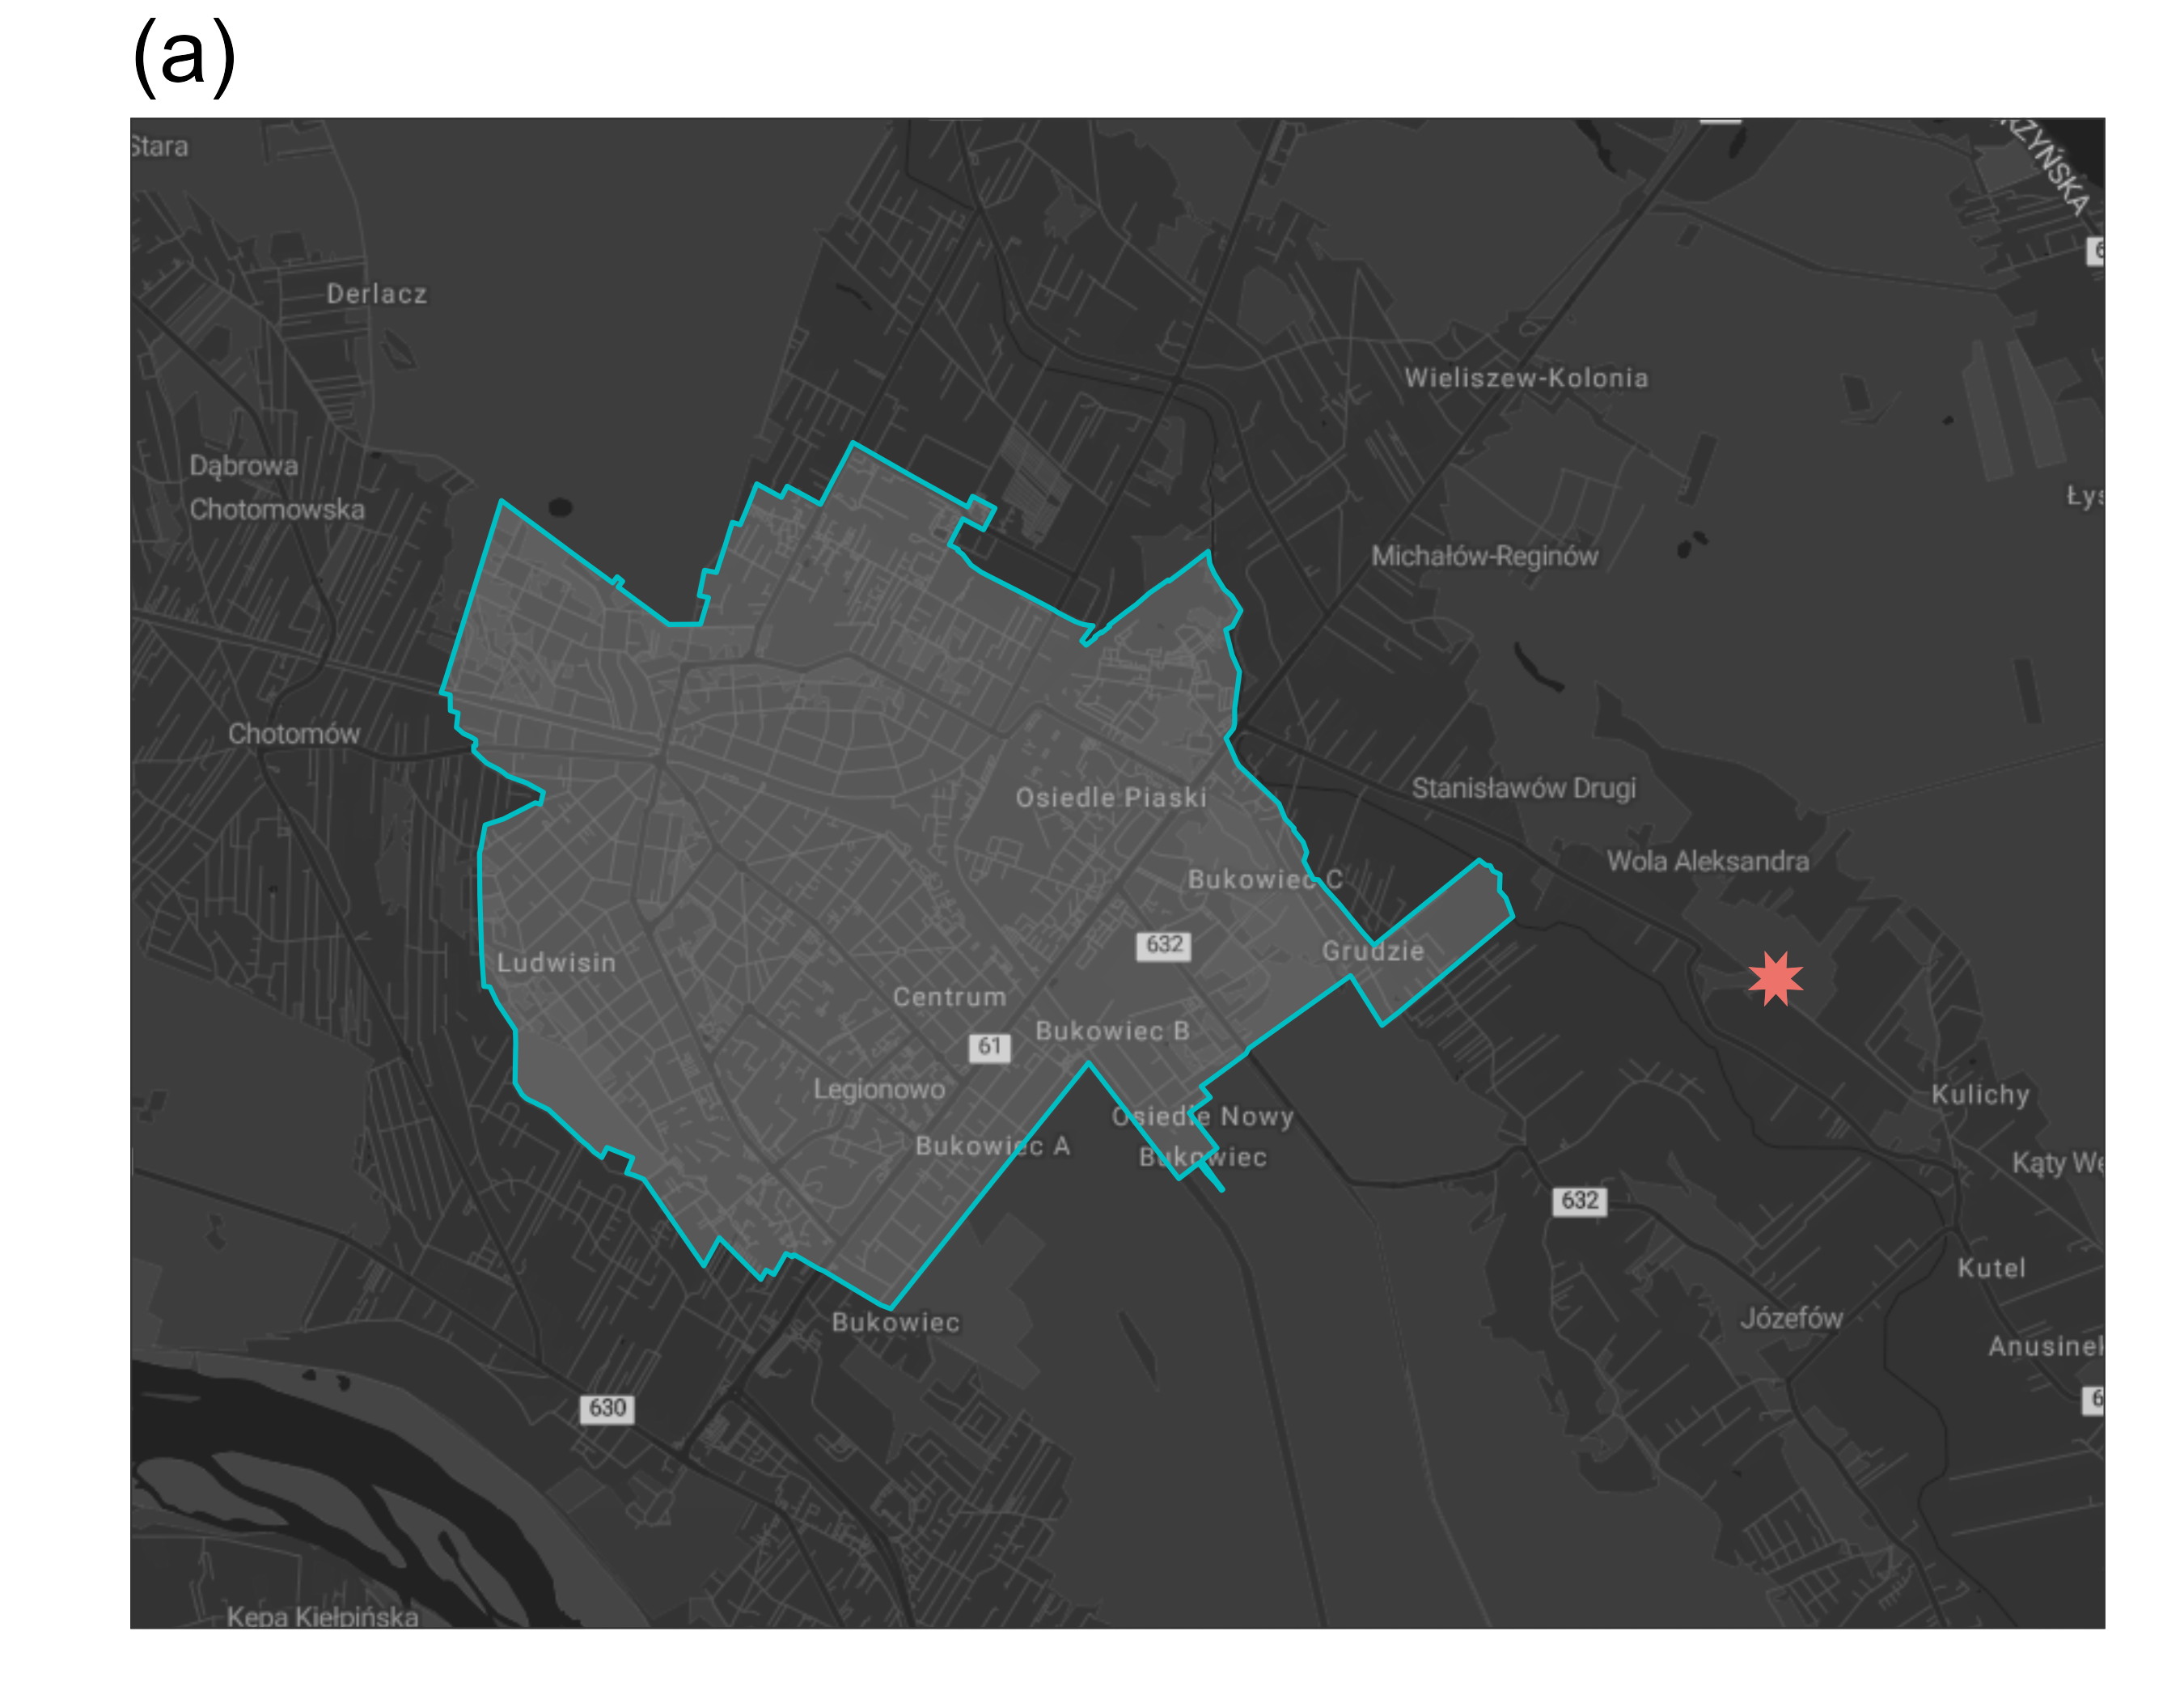 |  | 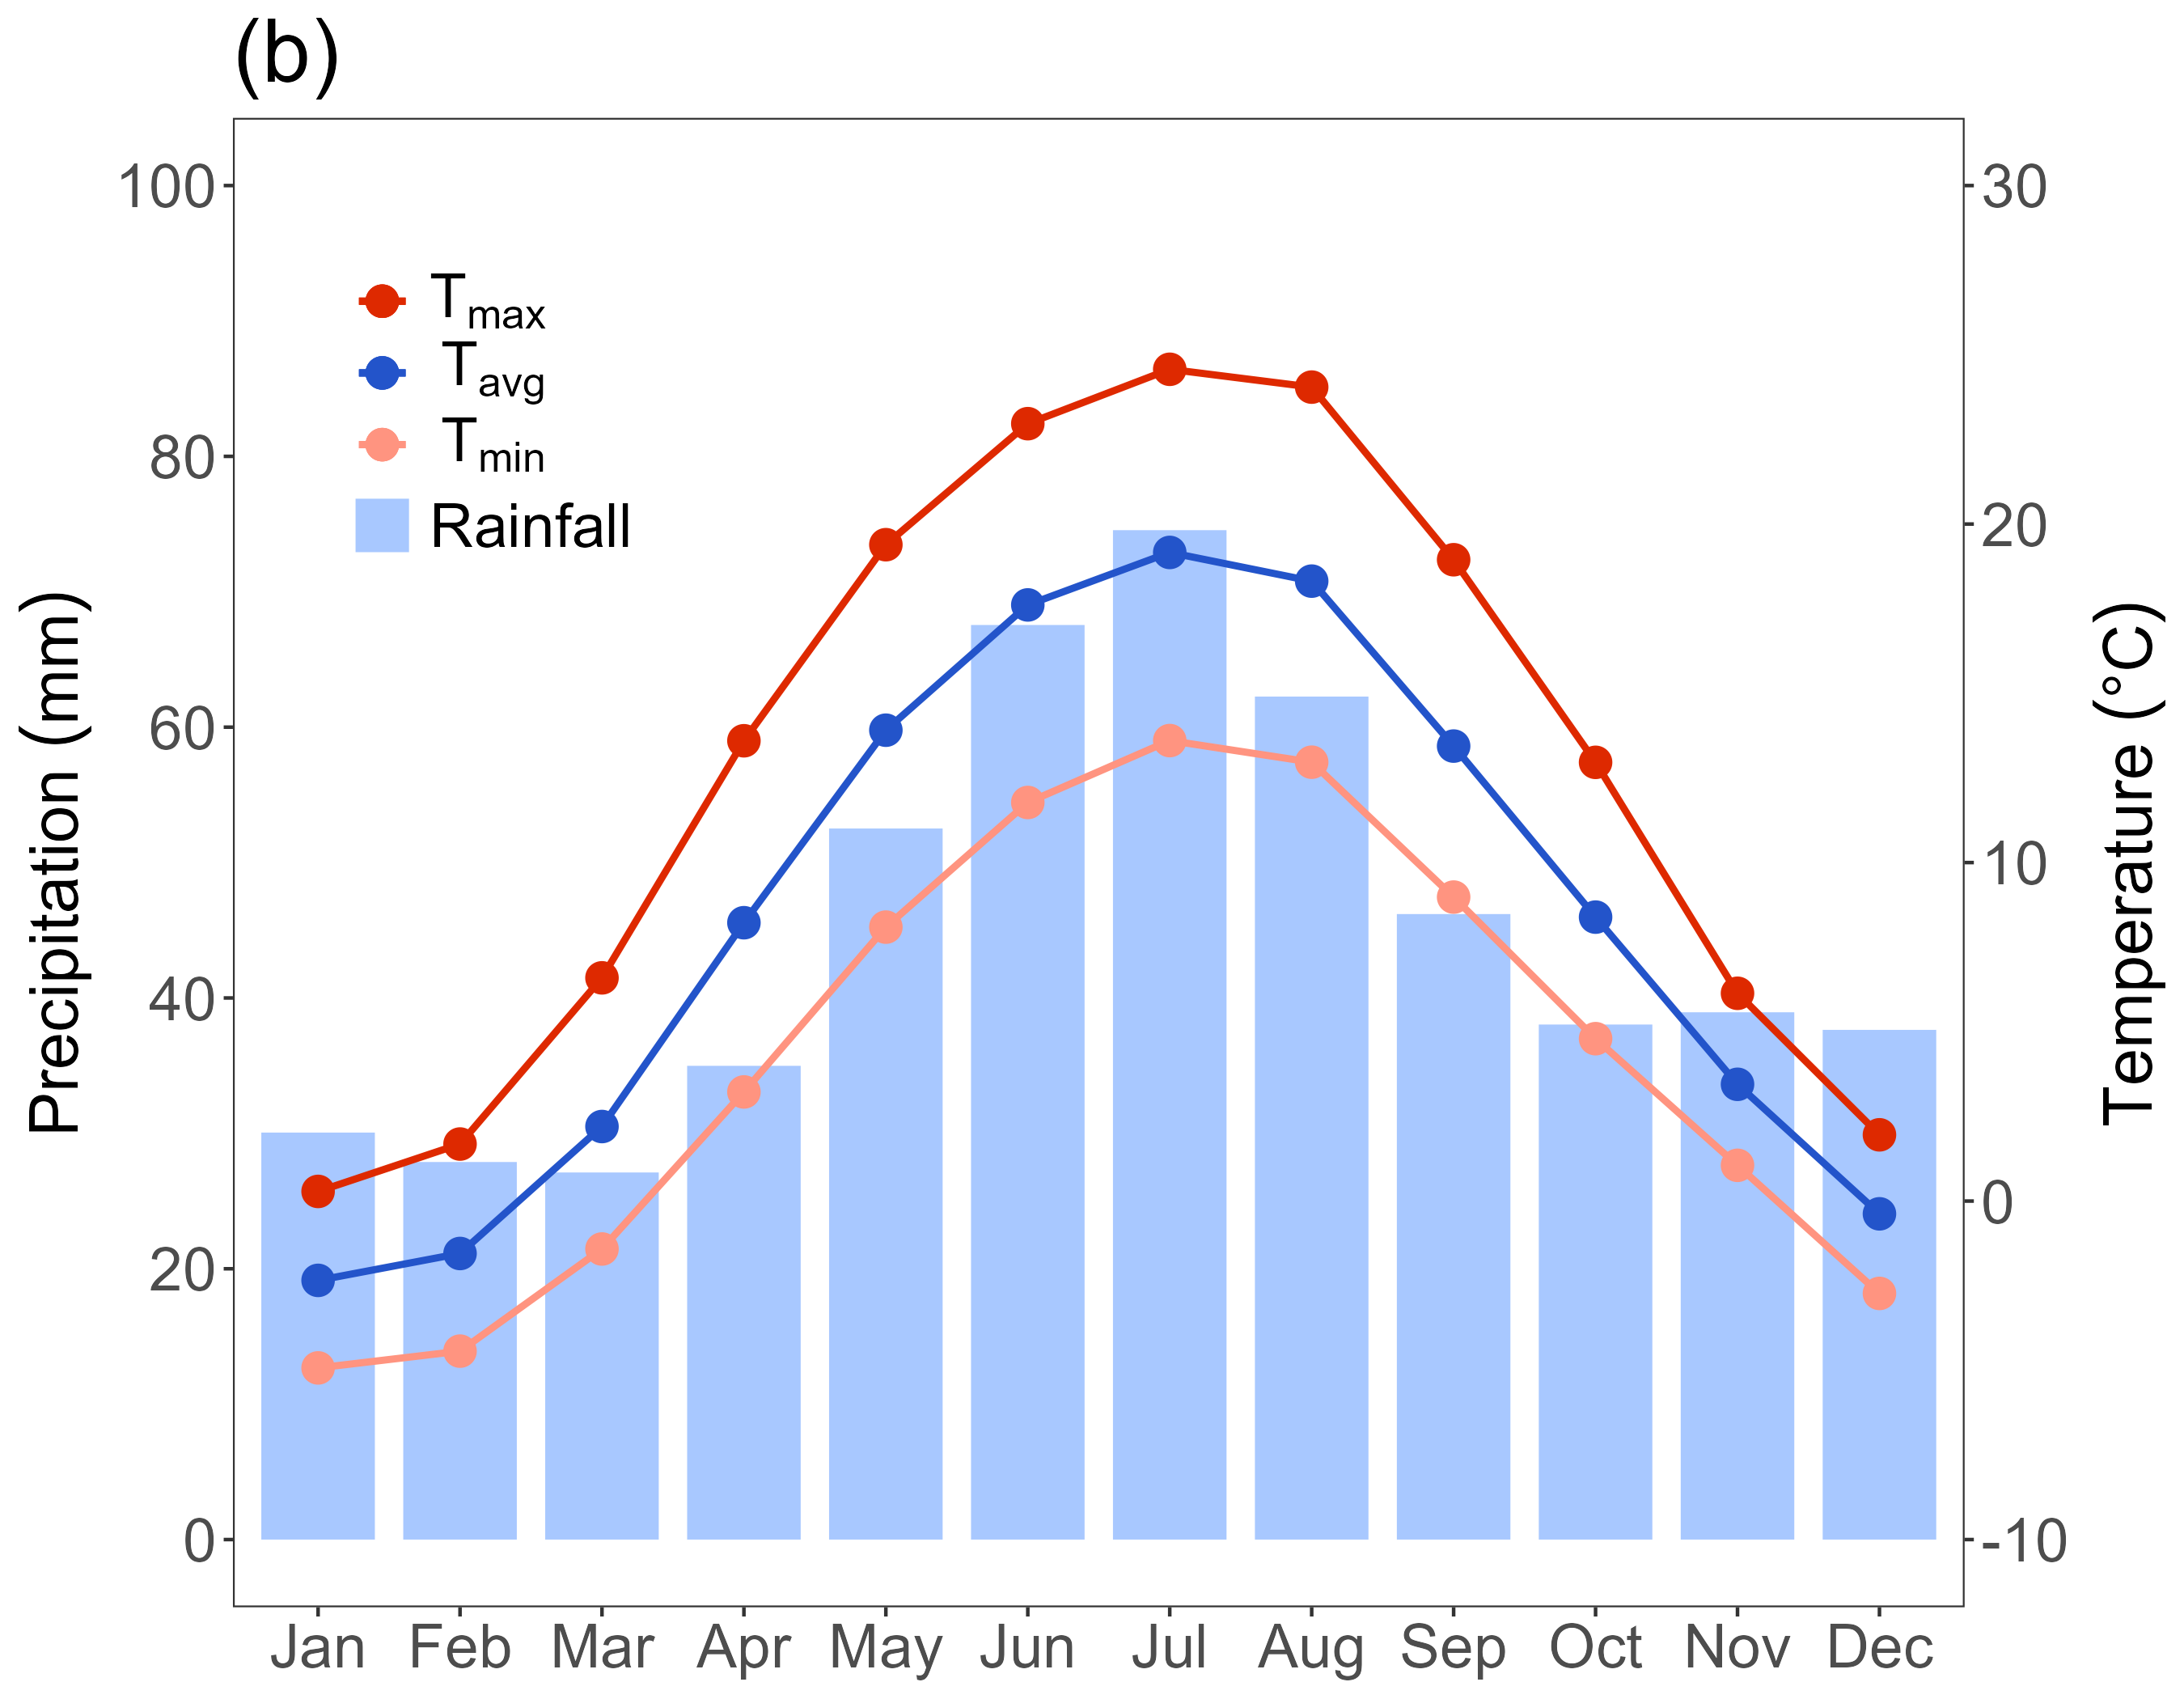 |
| --- | --- | --- |

**Supplementary Figure 1:** **(a)** Legionowo area (cyan polygon) and closest official meteorological station (red star, IMGW-PIB, <https://dane.impw.pl/> ). **(b)** Long term monthly climate observations from 1951 to 2023 for the Legionowo meteorological station. The colored lines show the minimum (Tmin), average (Tavg) and maximum (Tmax) air temperature in oC. The colored bars correspond to the monthly average precipitation amount in mm.


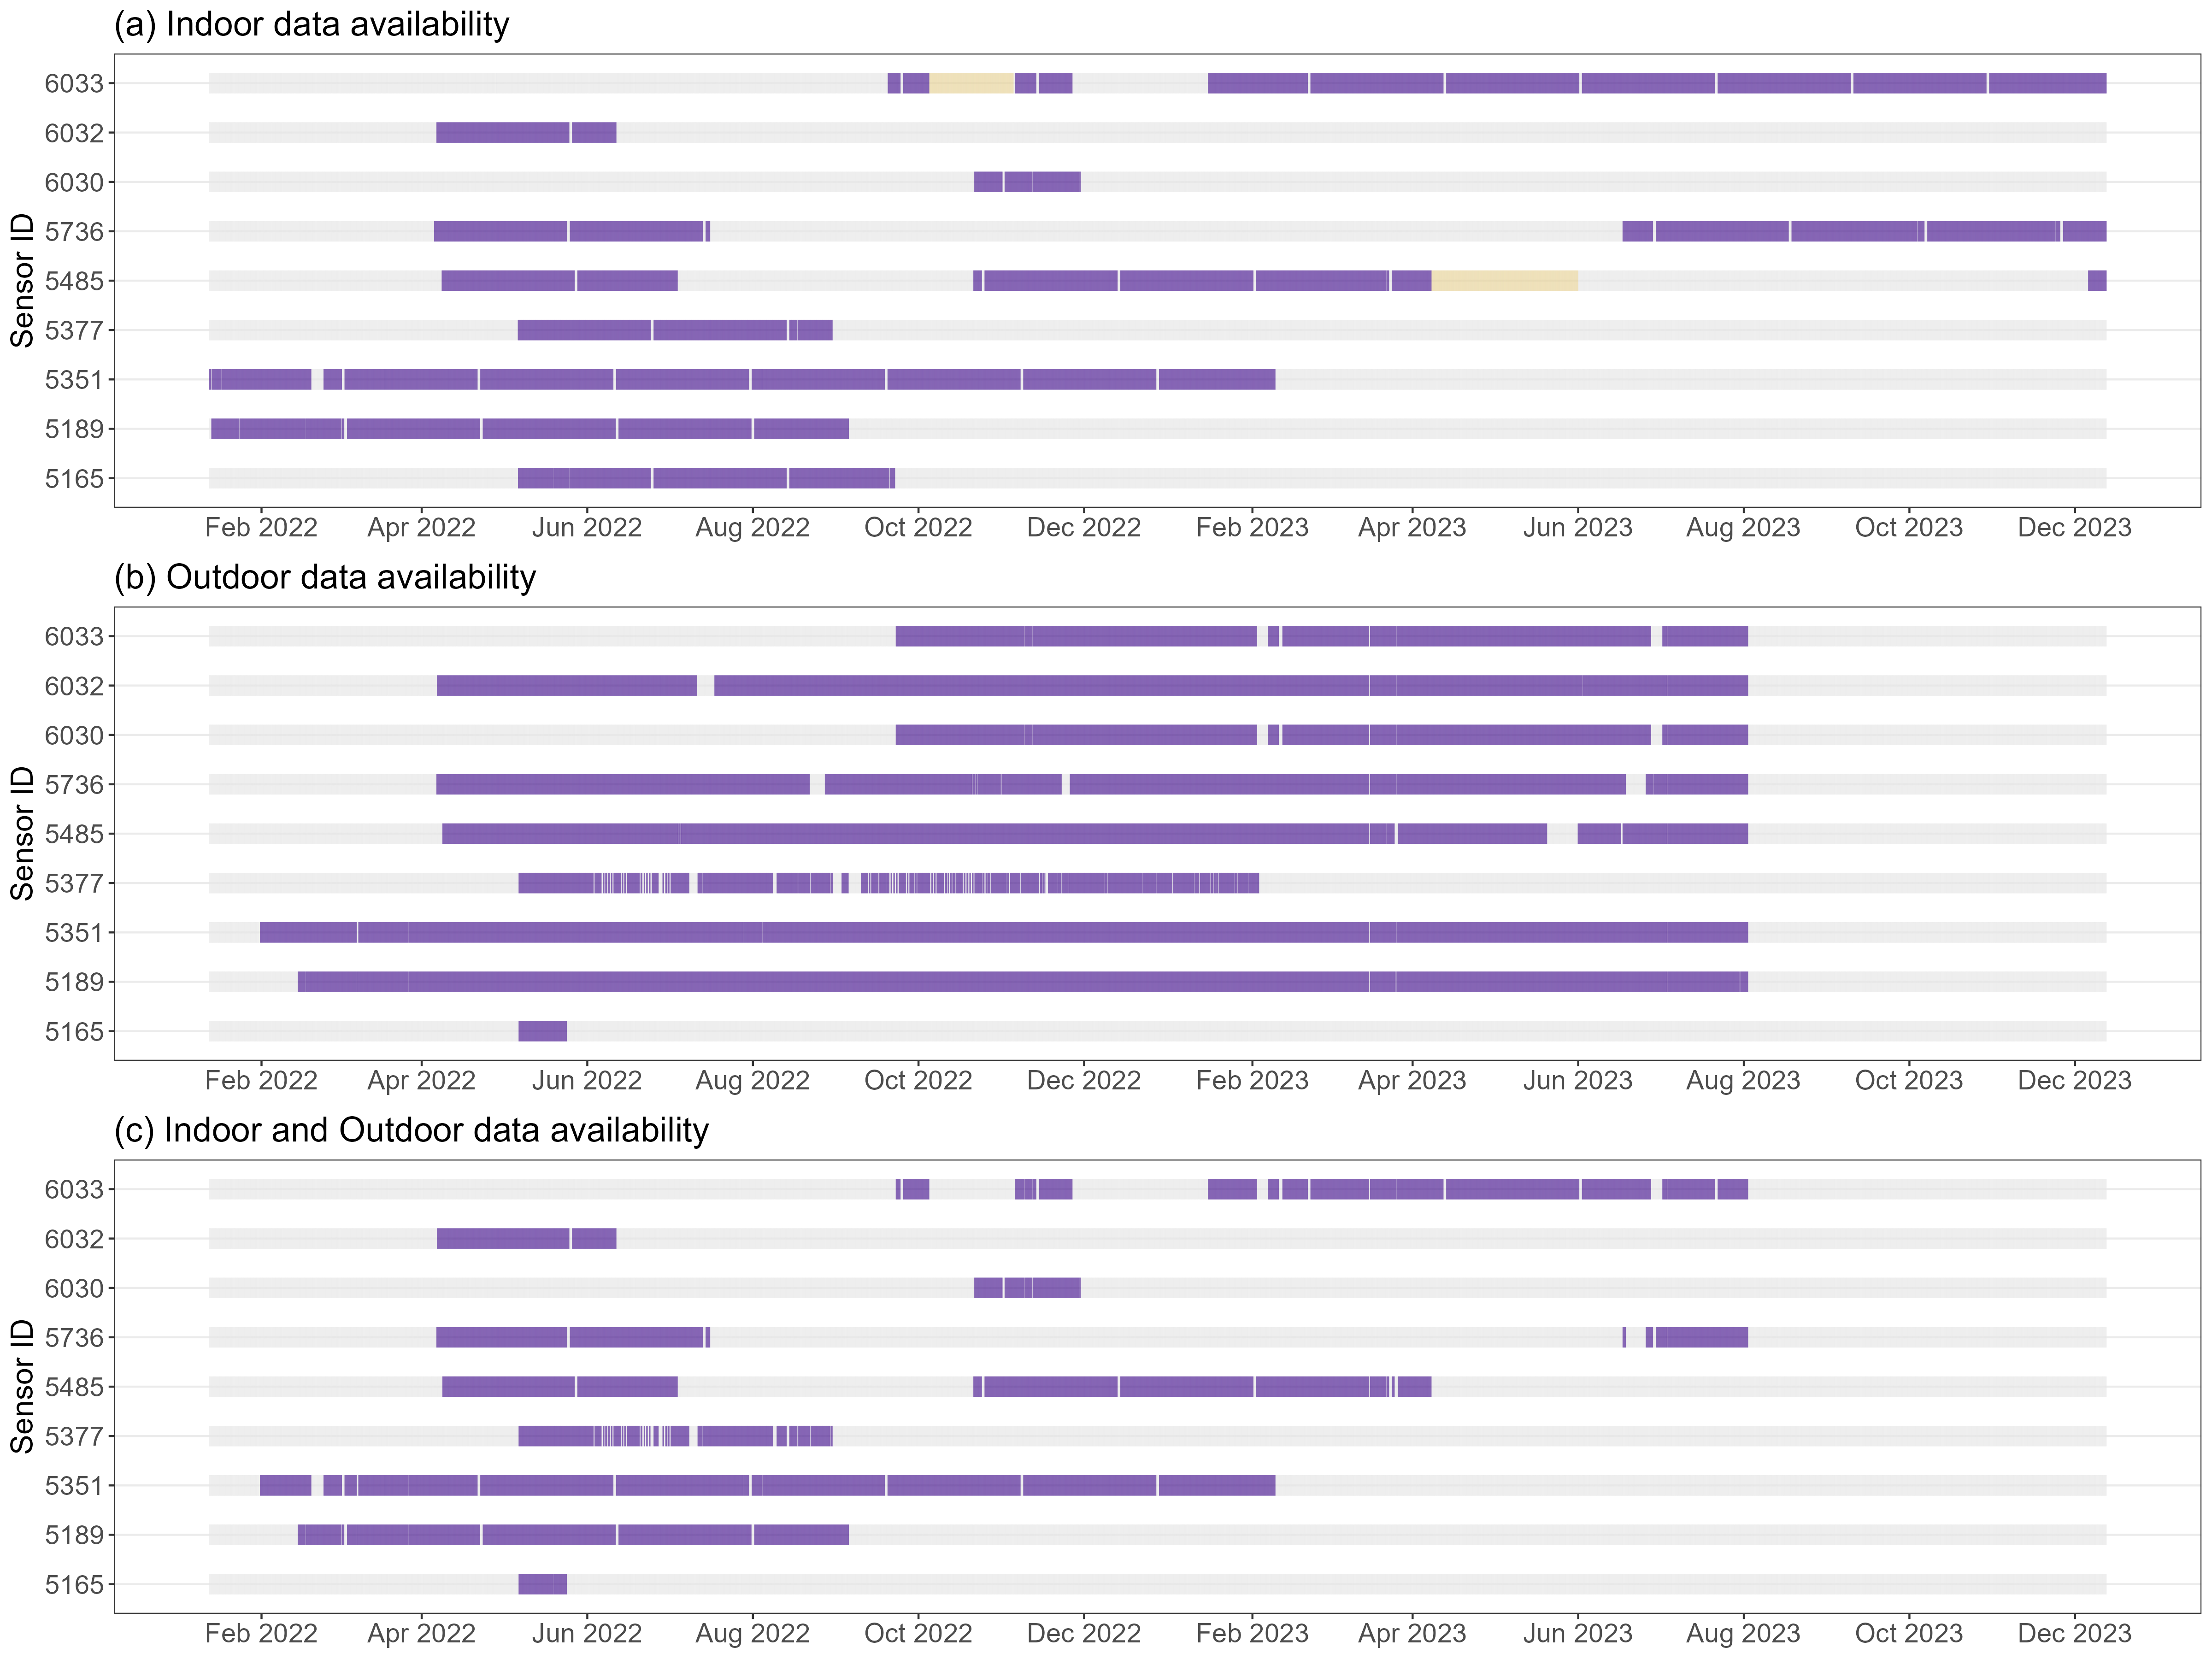


**Supplementary Figure 2:** Data availability diagrams for **(a)** indoor, **(b)** outdoor and **(c)** both indoor and outdoor sensors from January 2022 to December 2023. The regions in purple show the periods with available measurements for each sensor and the gray regions the missing cases. The yellow shading areas in panel are attributed to instances with potential sensor malfunction (presence of substantially elevated concentrations). The data availability plot for both indoor and outdoor sensors does not include the abnormal indoor observations.

**
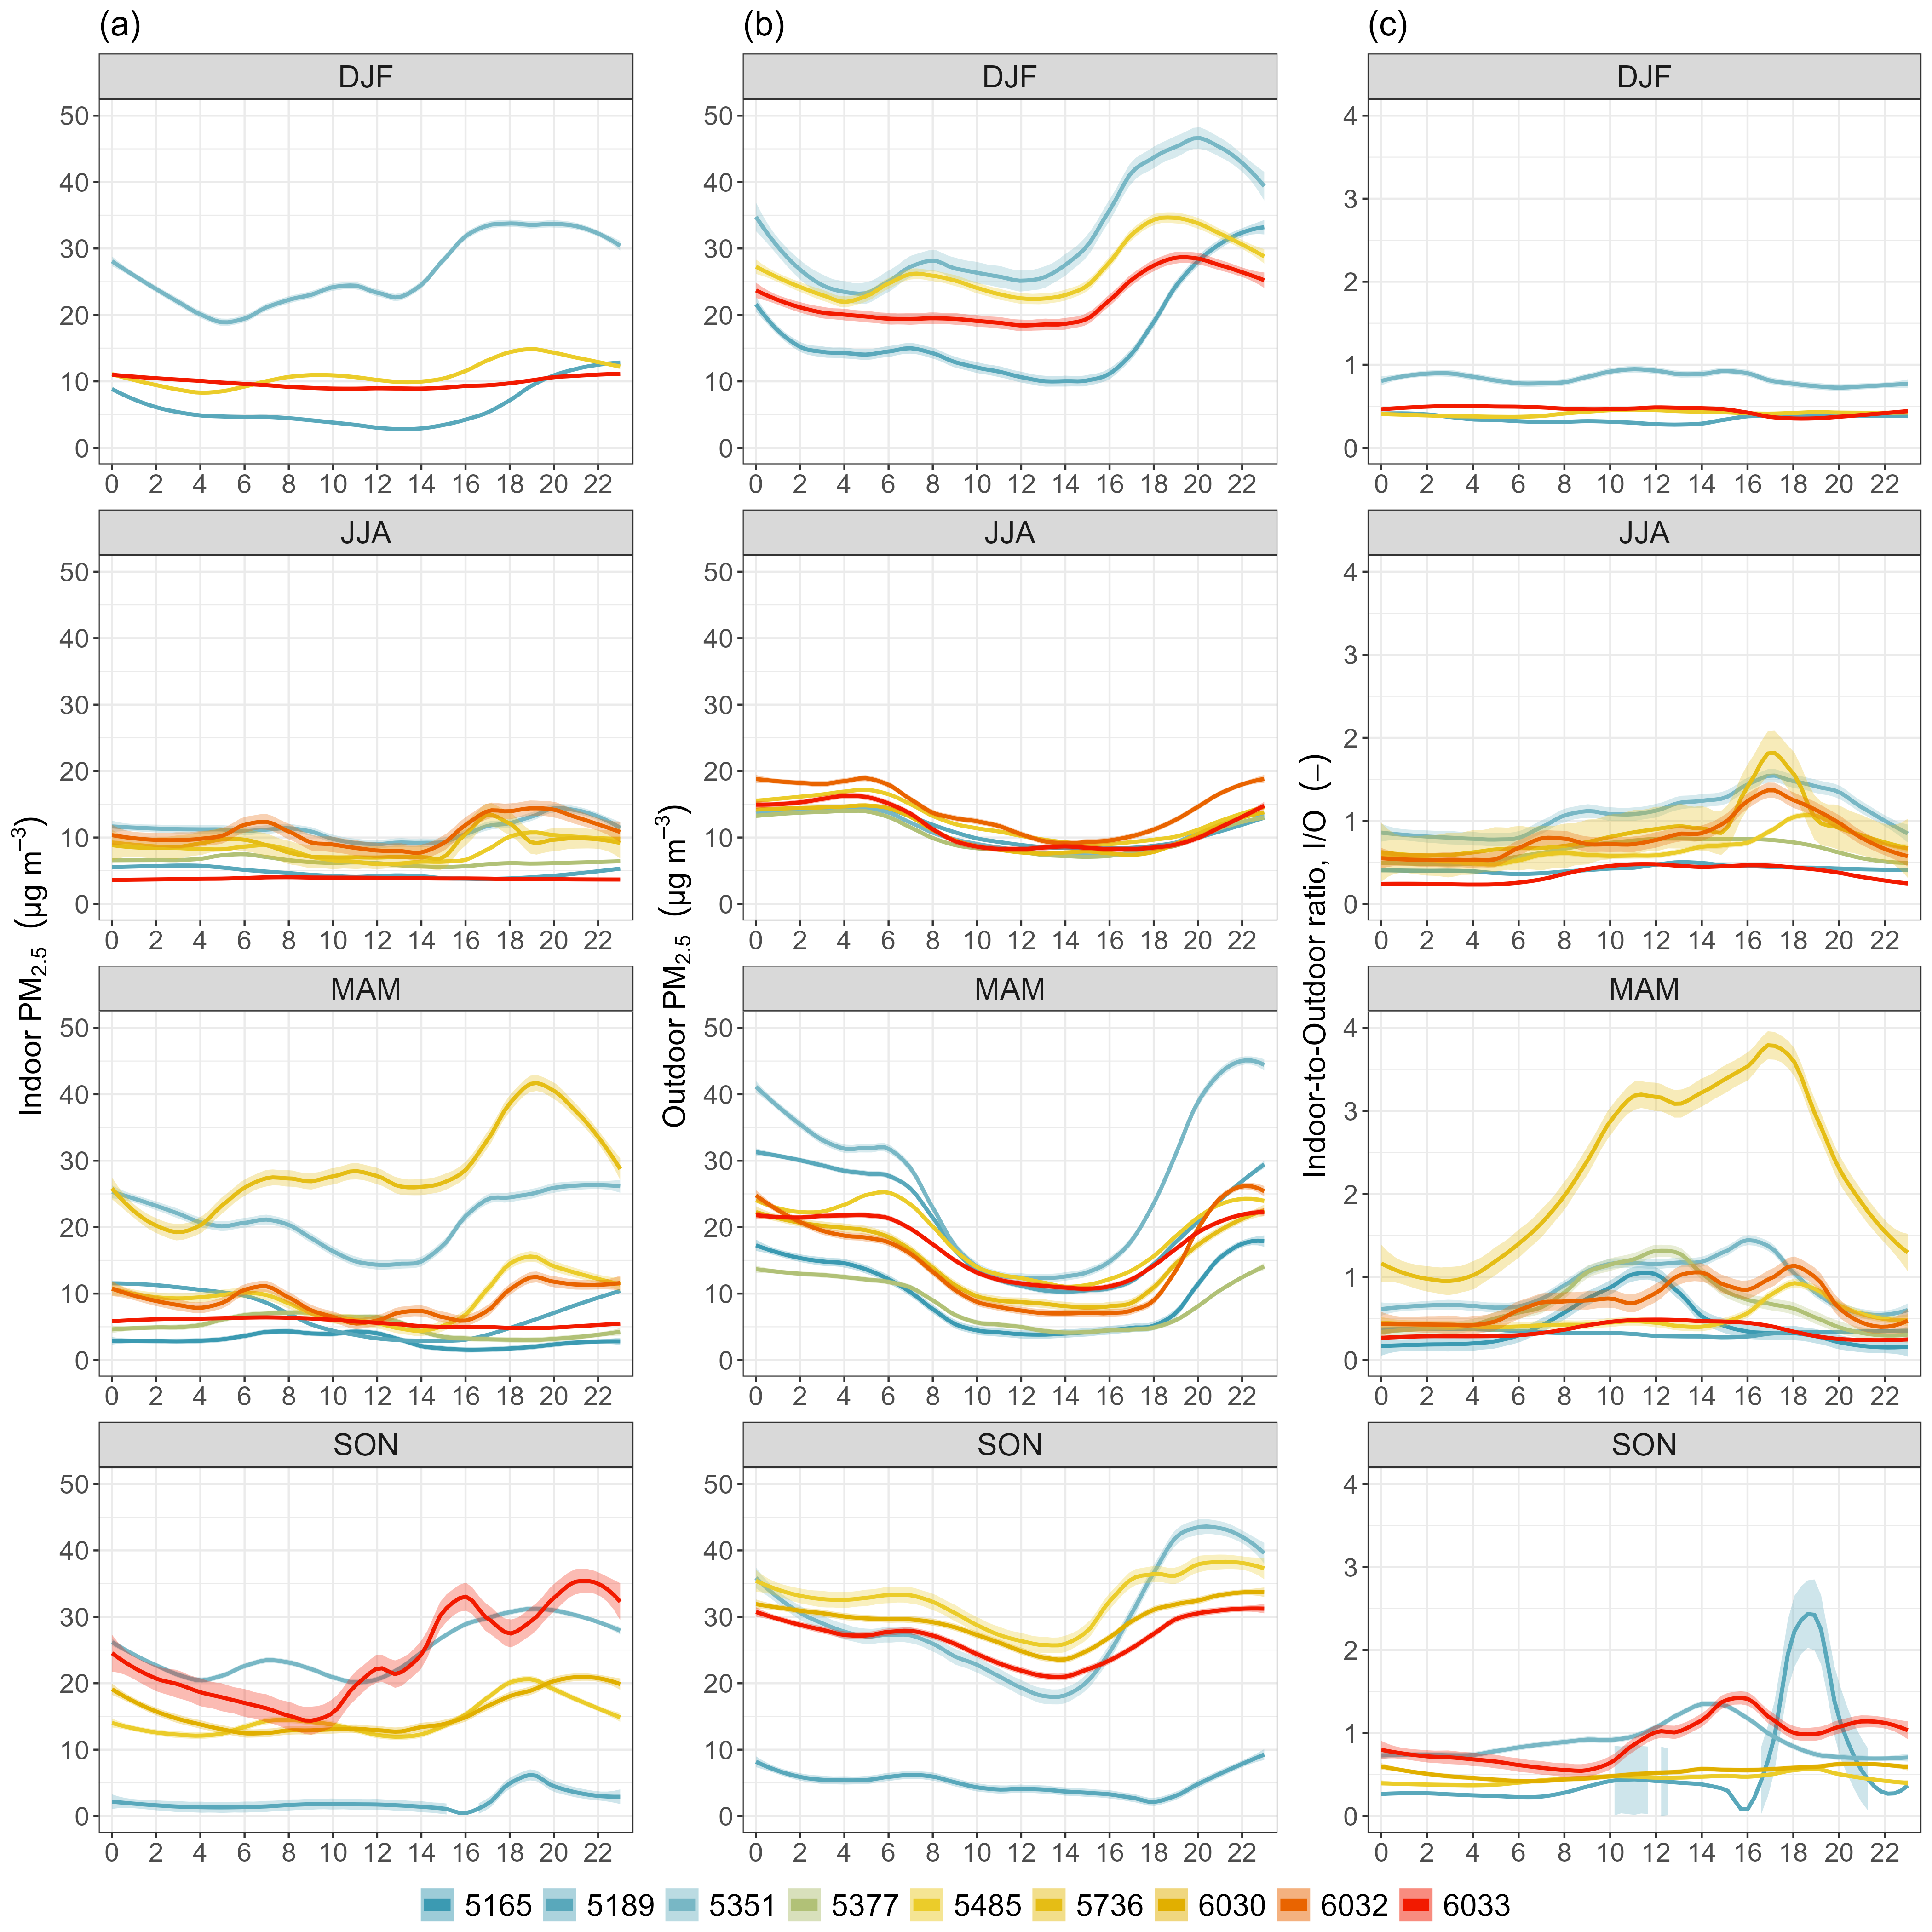
**

**Supplementary Figure 3:** Temporal distribution of **(a)** average hourly indoor PM2.5 **(b)** average hourly outdoor PM2.5 and **(c)** median Indoor-to-Outdoor concentration ratio, for each season and hour of the day. The PM2.5 concentrations are in μg m–3 and I/O ratio is unitless. The values are smoothed using a loess fit. The horizontal axis shows the hour of the day. The shaded colored areas show the standard errors of the loess fits. Different colors correspond to the various indoor sites (IDs). The seasons are DJF (Winter: December-January-February), MAM (Spring: March-April-May), JJA (Summer: June-July-August) and SON (Autumn: September, October, November)


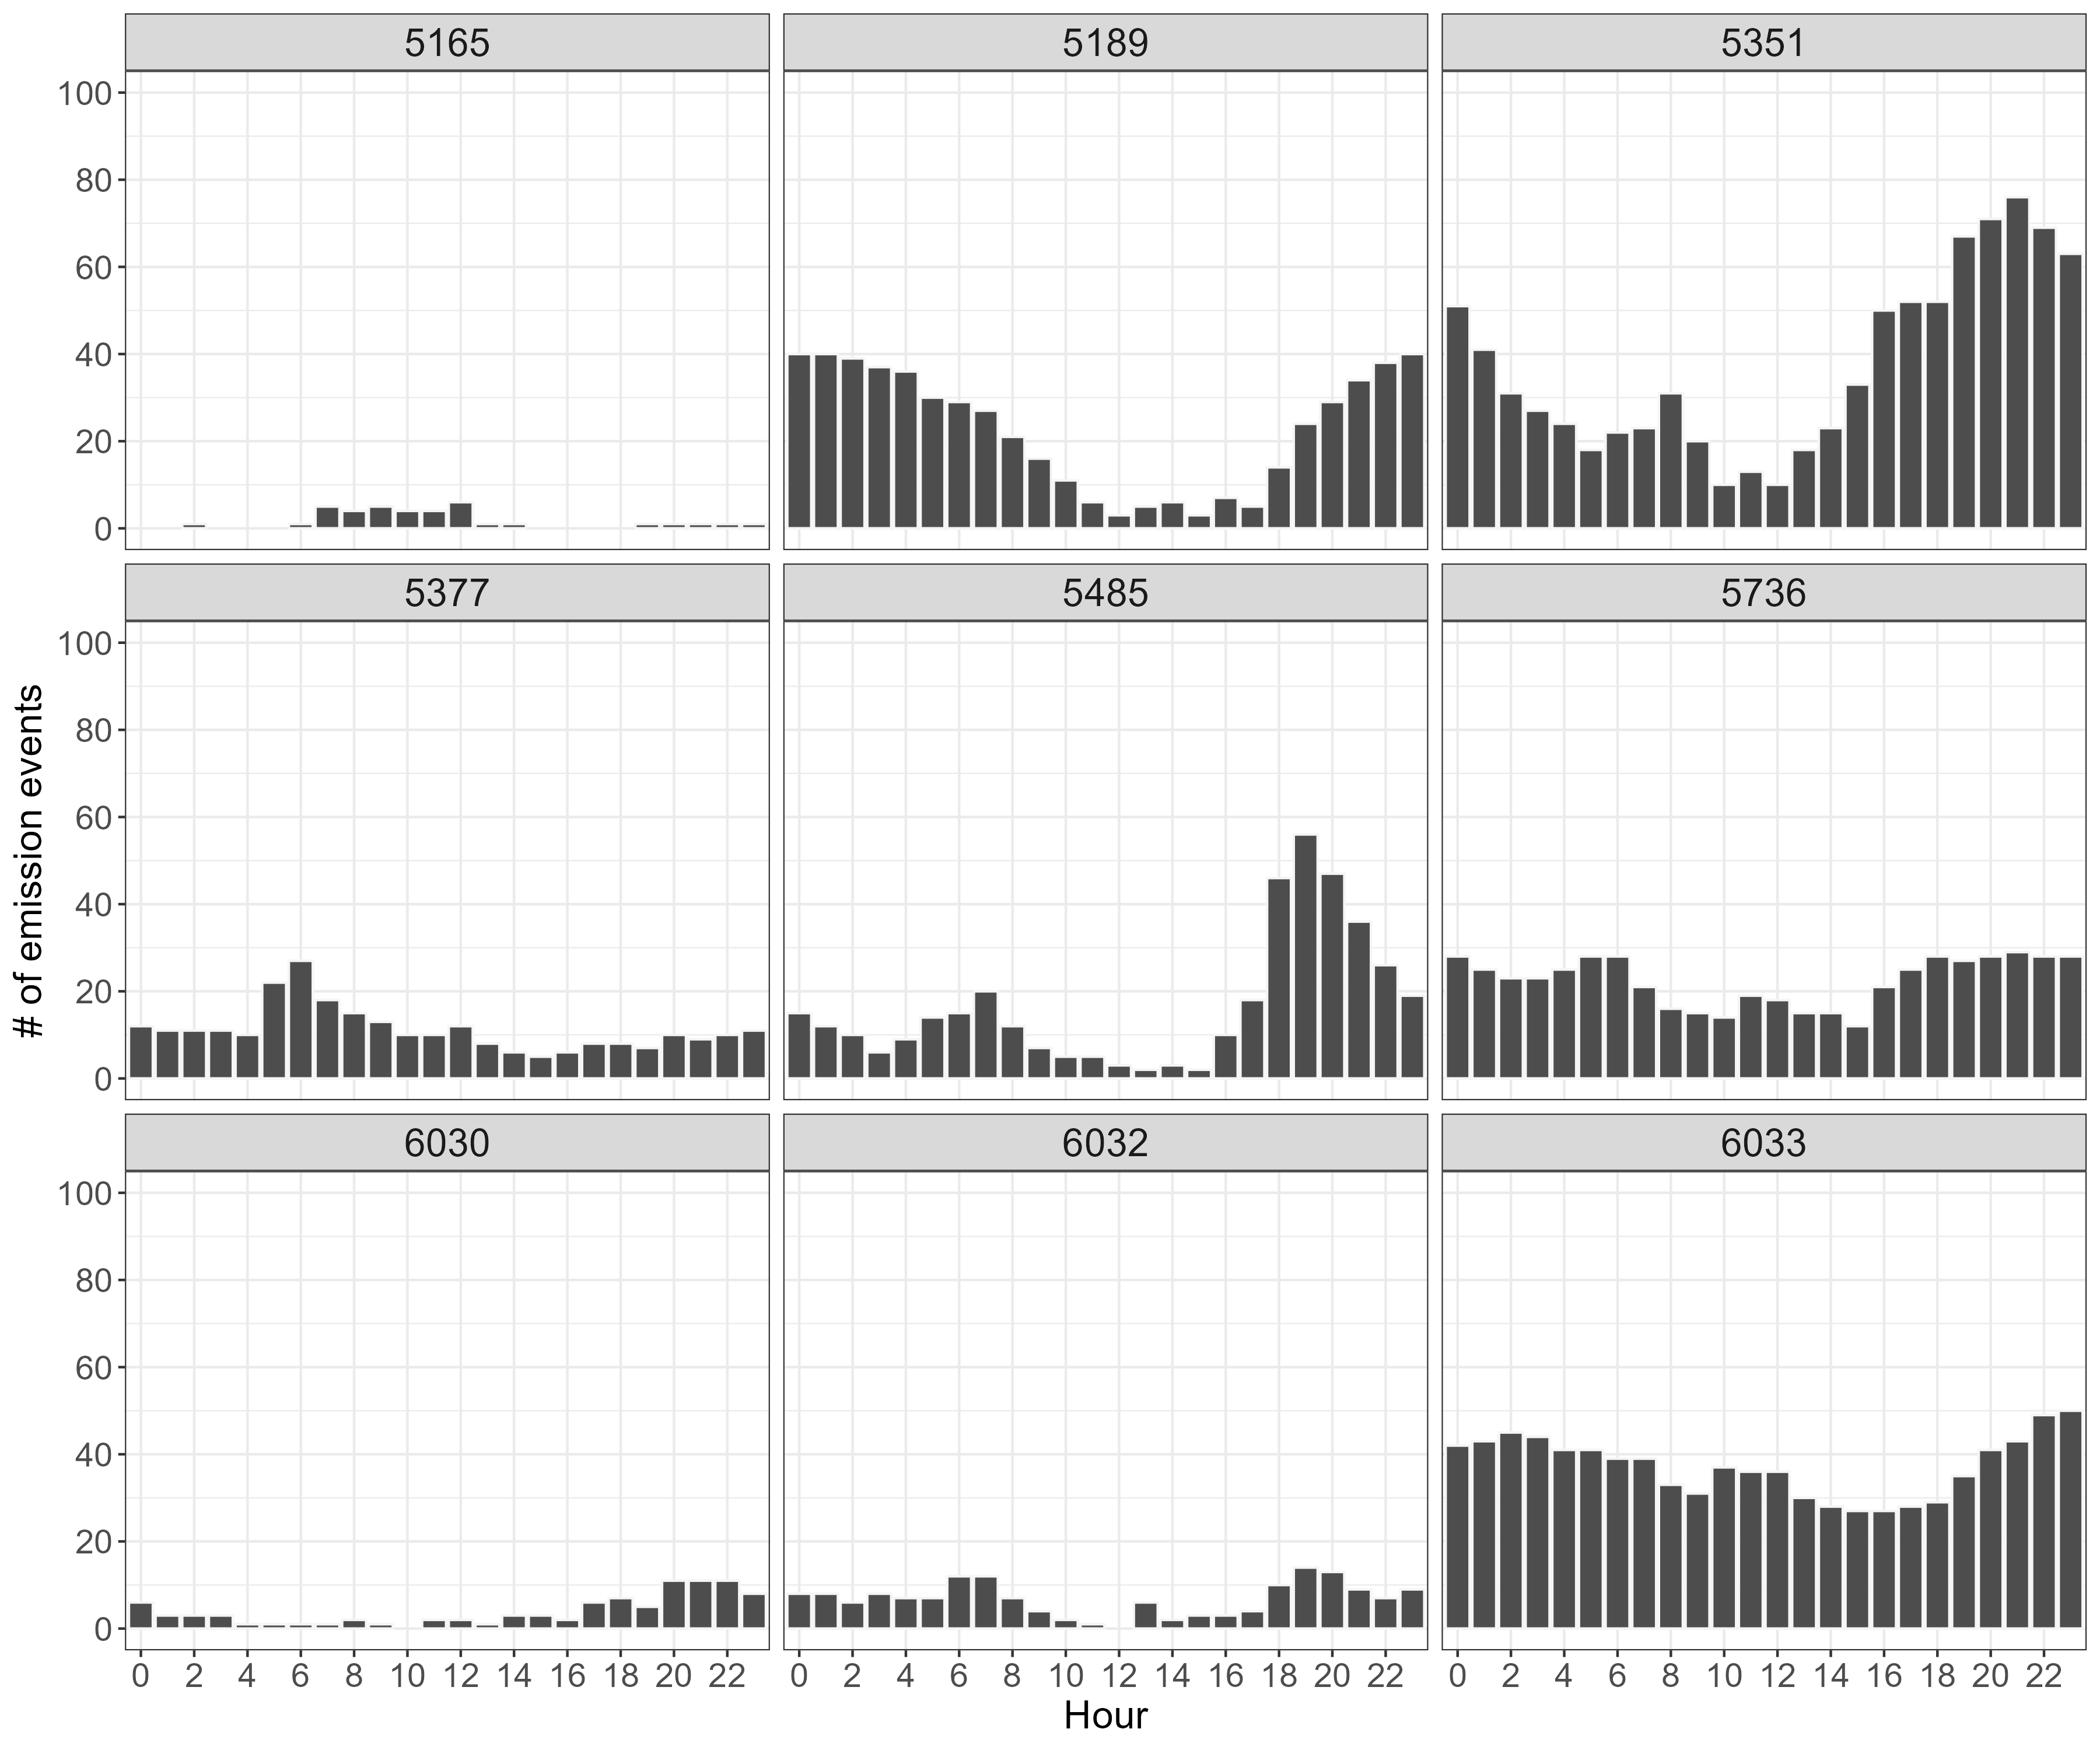


**Supplementary Figure 4:** Diurnal distribution of the number of emission events for the air quality sensors in Legionowo. Each bar corresponds to the total number of emission events per hour detected through the REBS method.


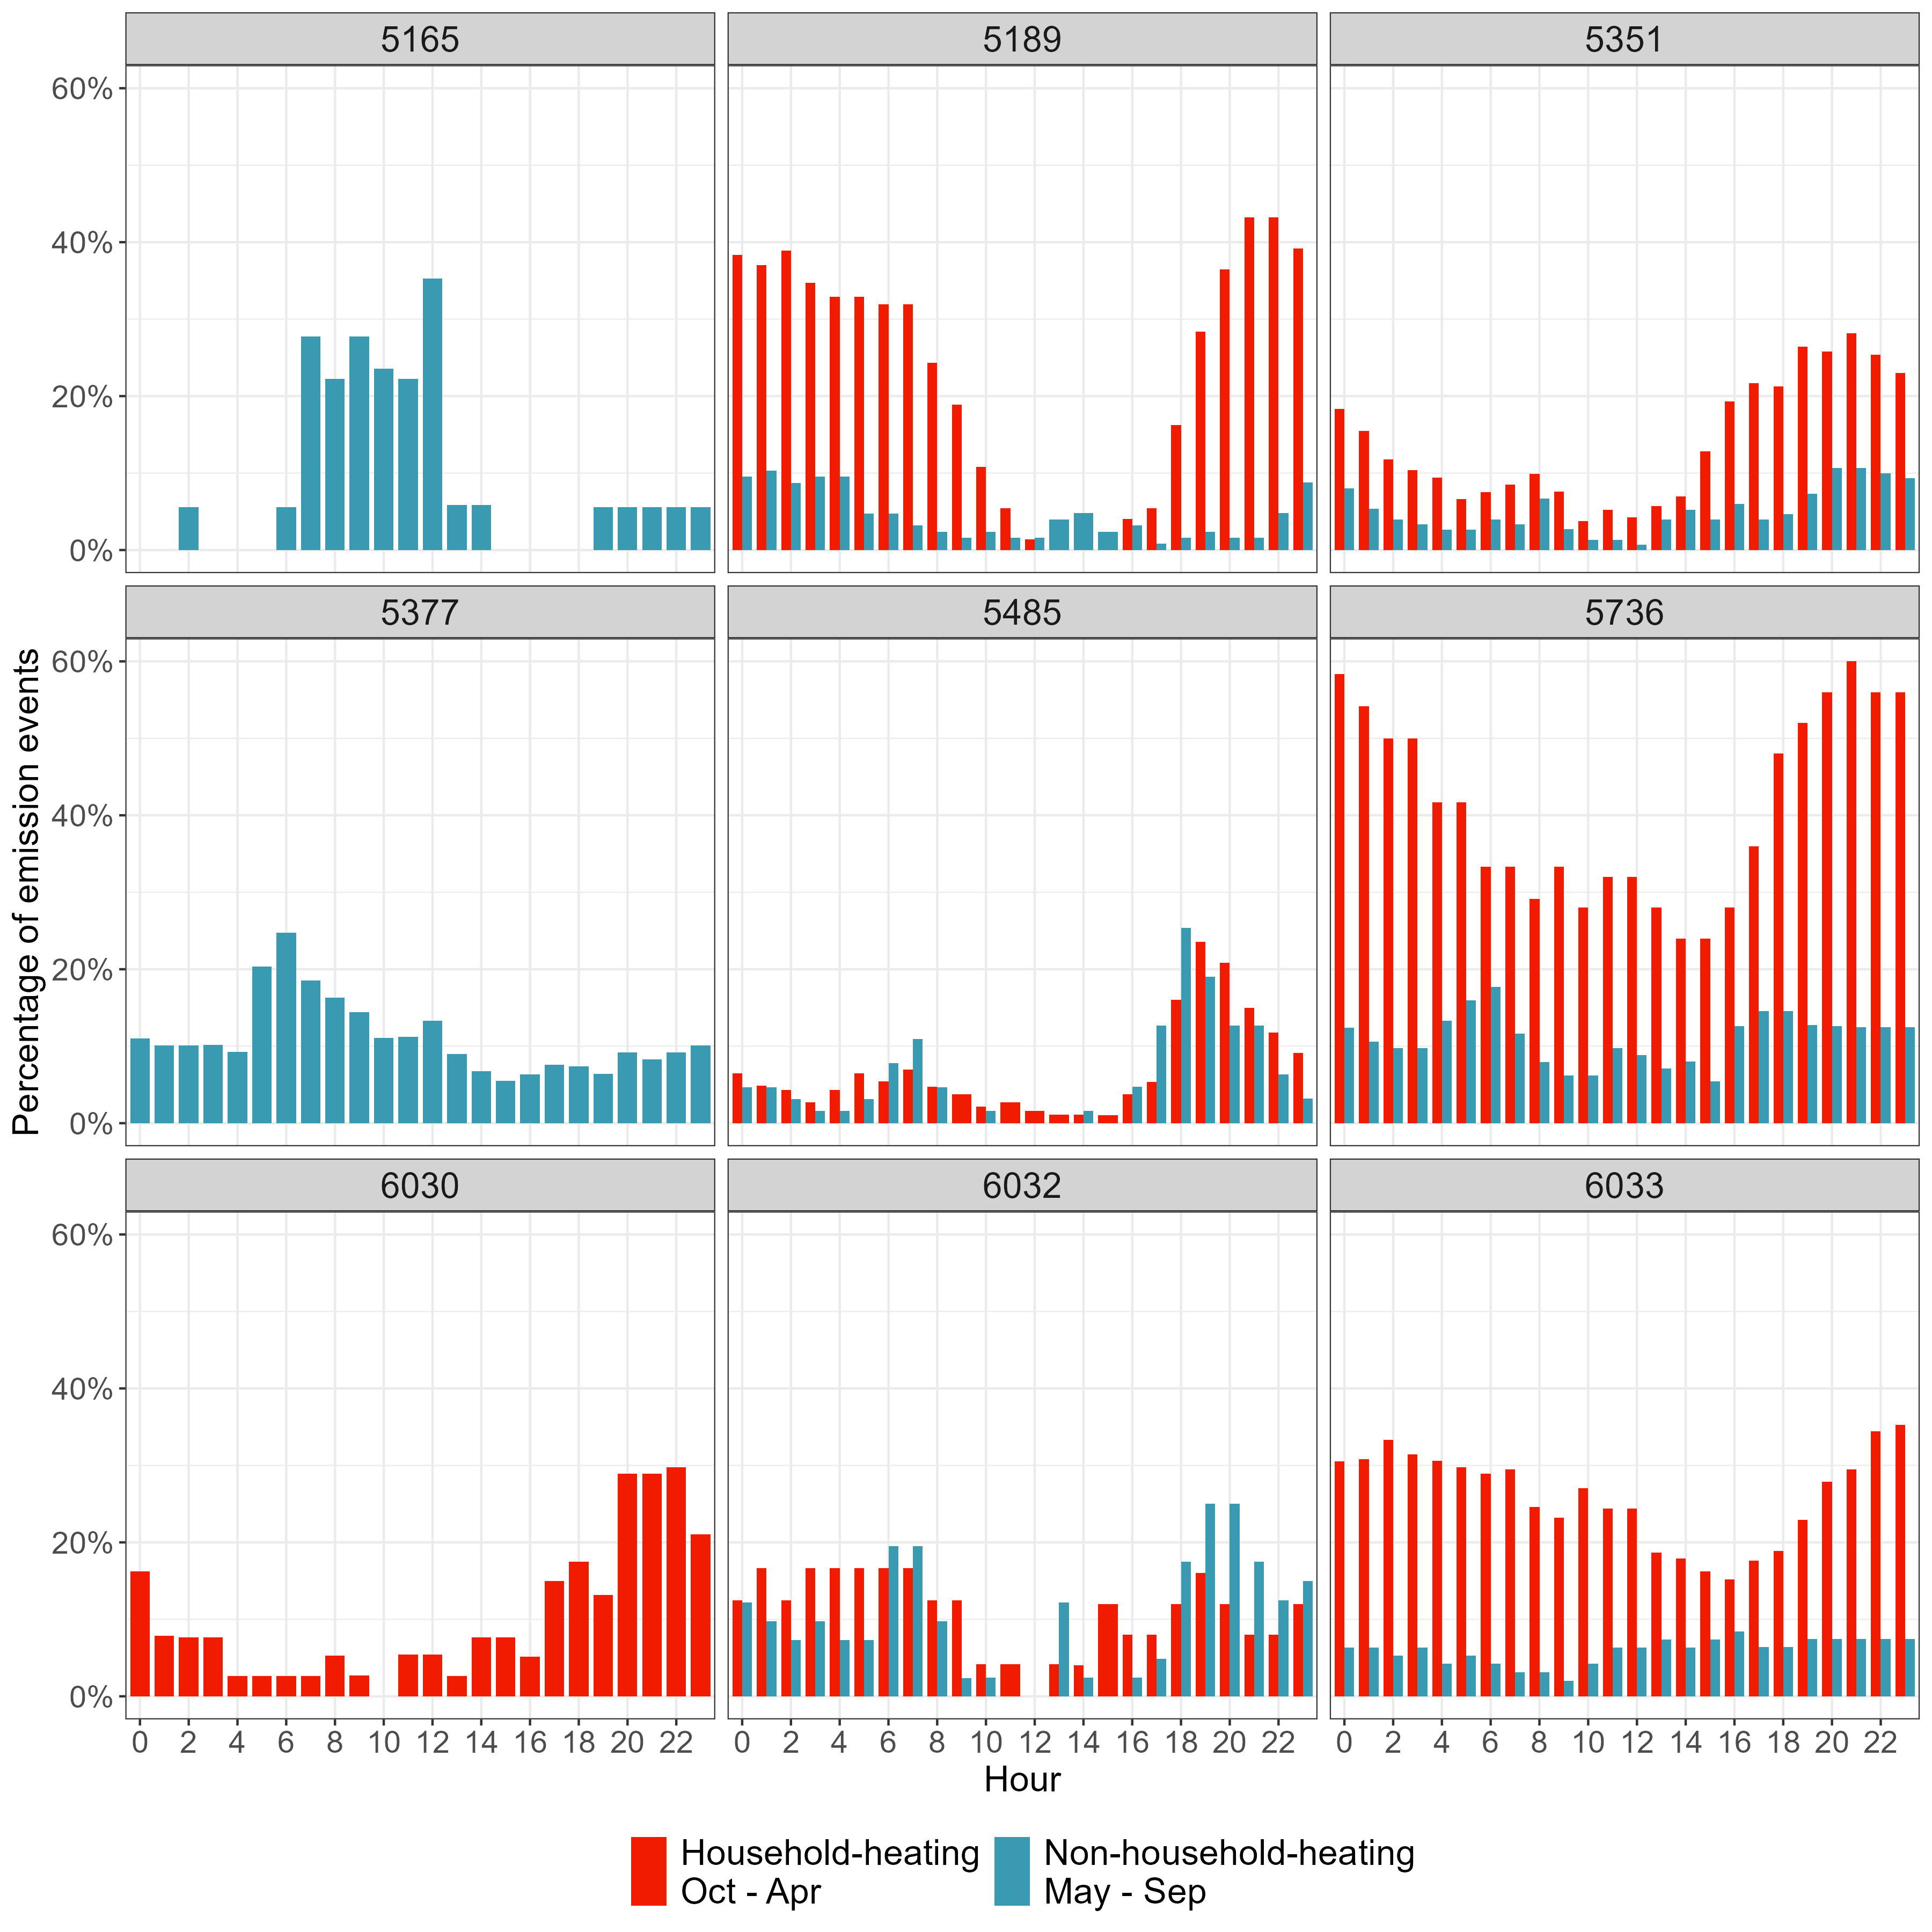


**Supplementary Figure 5:** Temporal distribution of the percentage of emission events per hour for the air quality sensors in Legionowo from October to April (‘Heating’) and from May to September (‘Non-Heating’). Each point corresponds to the total number of emission events per hour detected through the REBS method.


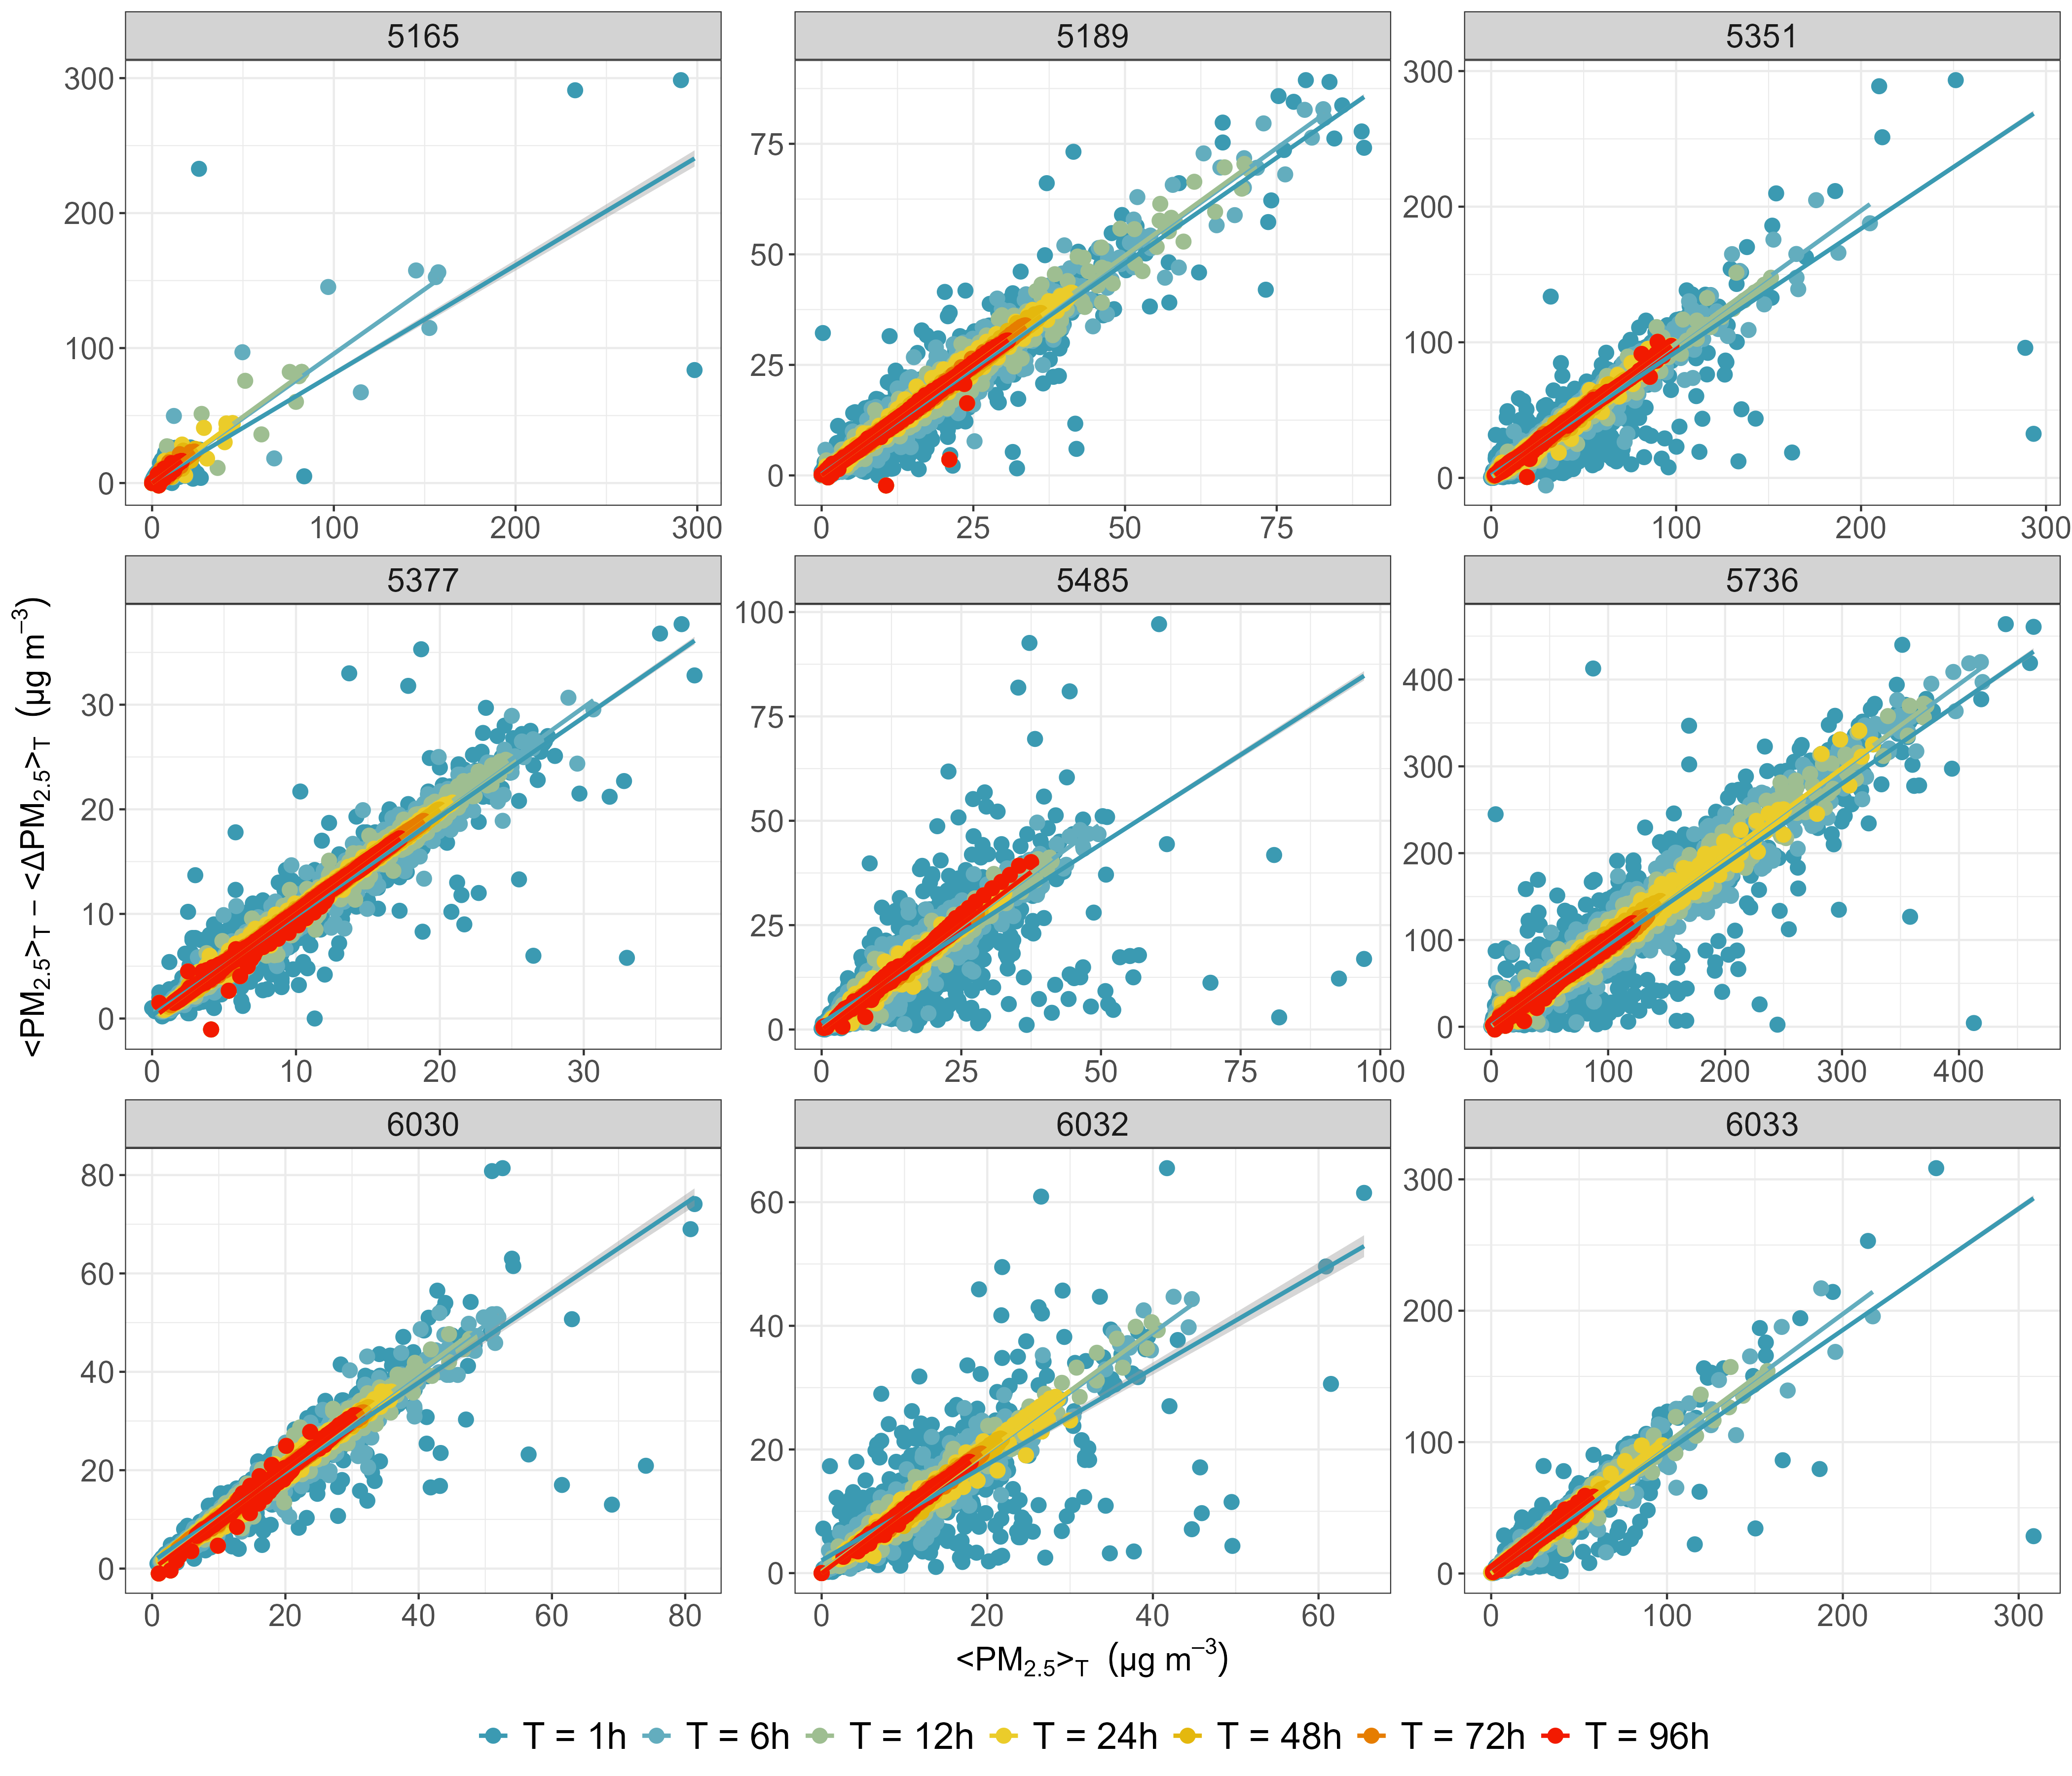


**Supplementary Figure 6:** Scatter-plots of <Cin(t)>T – <ΔCin(t)>T and <Cin(t)> T for the indoor sensors in Legionowo. Different colors correspond to the temporal windows T.

**
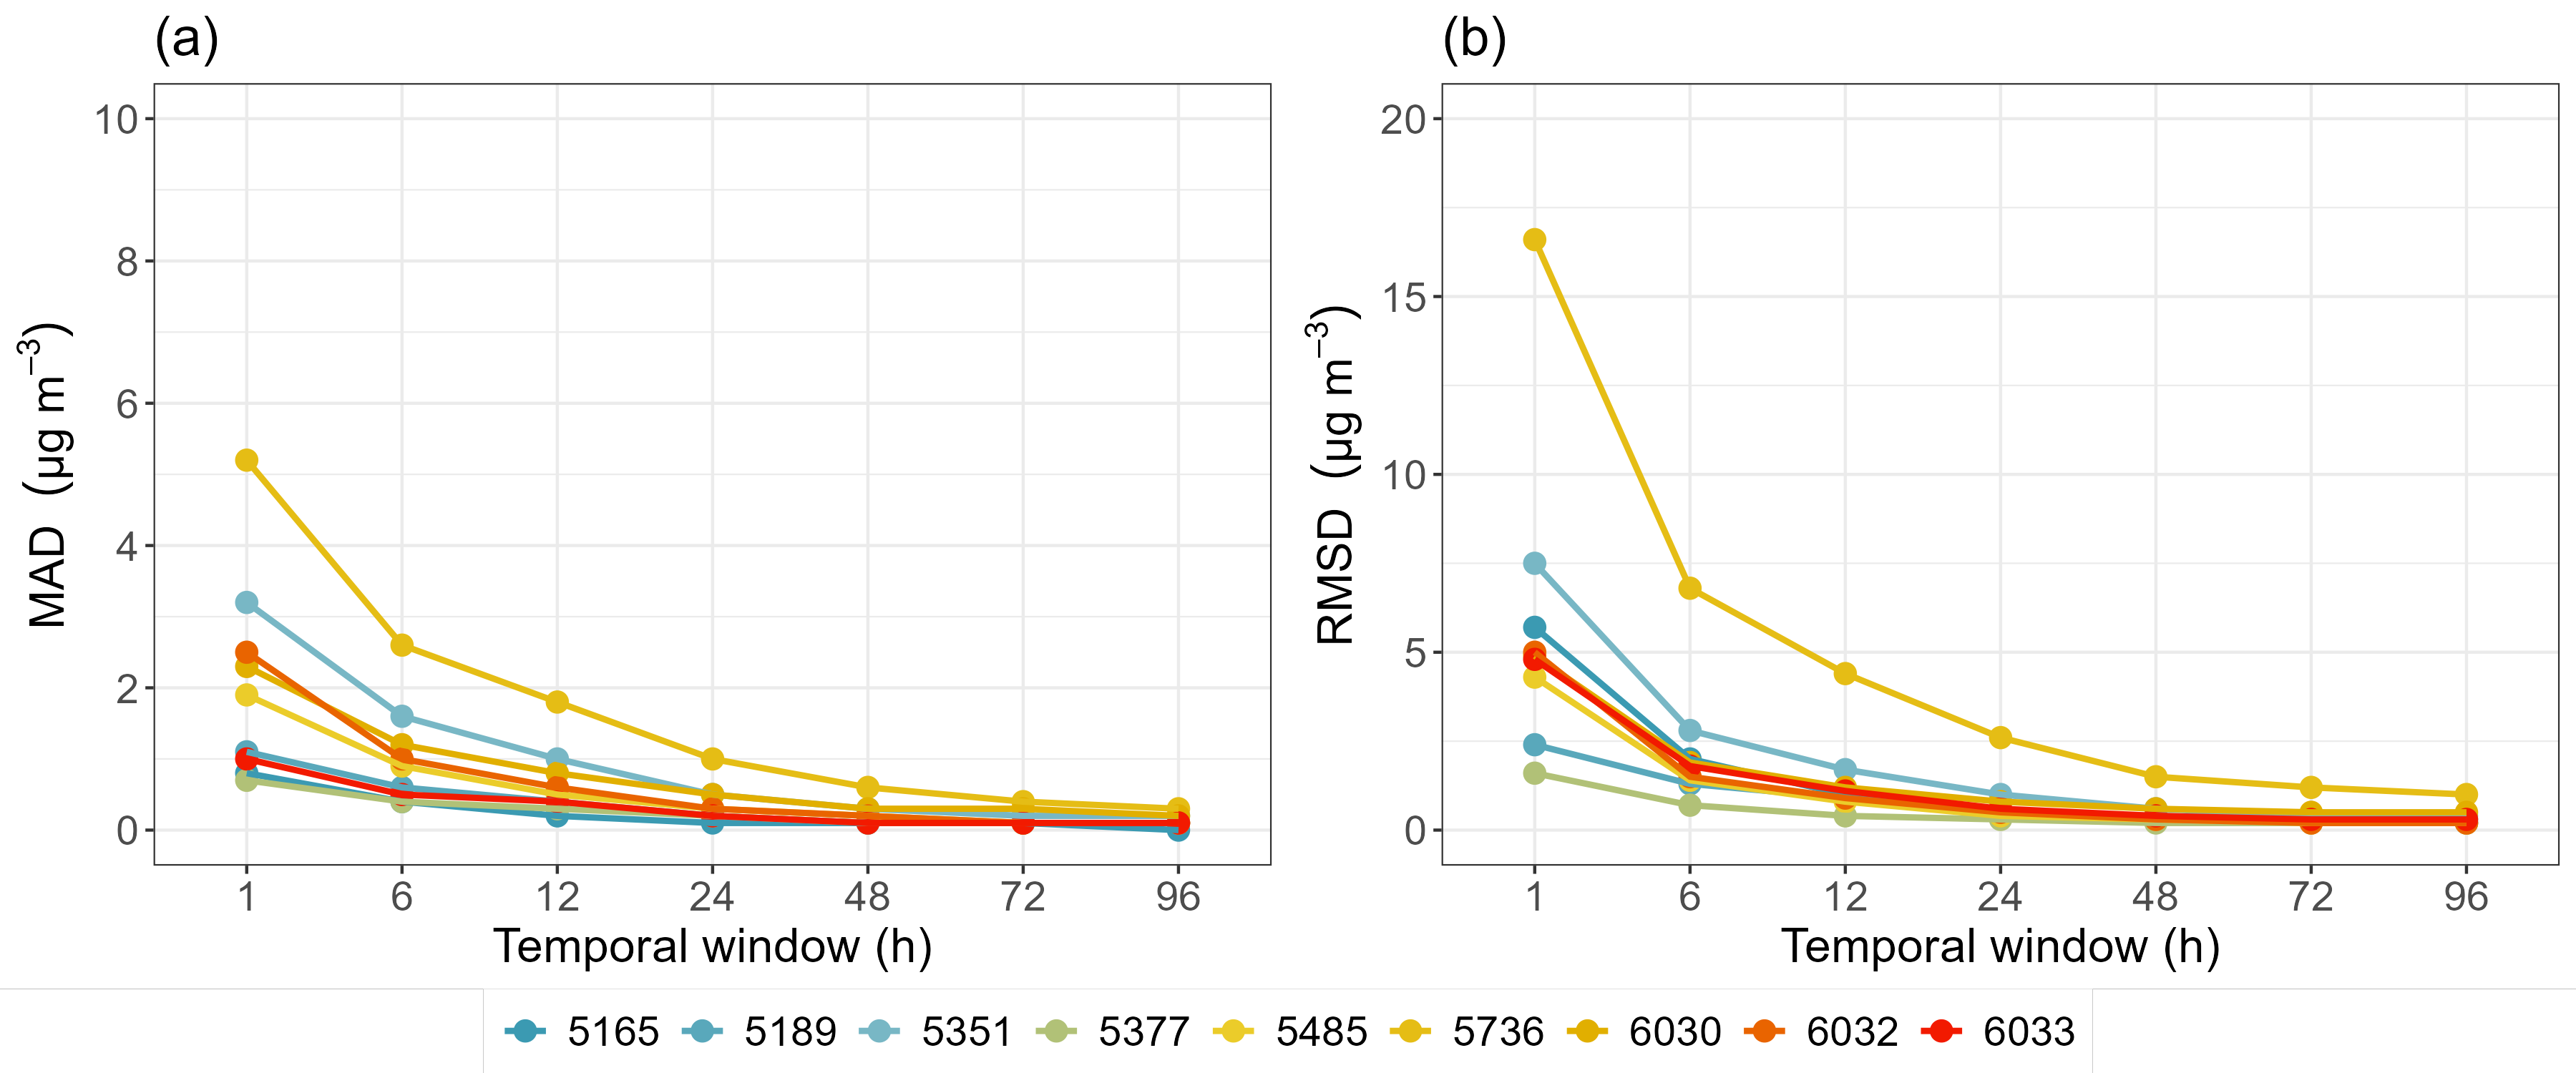
Supplementary Figure 7:** **(a)** Mean Absolute Deviation **(b)** Root Mean Square Deviation calculated between <Cin(t)>T – <ΔCin(t)>T and <Cin(t)> T. The colored points and lines correspond to the indoor air quality sensor locations (IDs) in Legionowo. The units in the vertical and the horizontal axis are μg m–3 and hours, respectively.

**
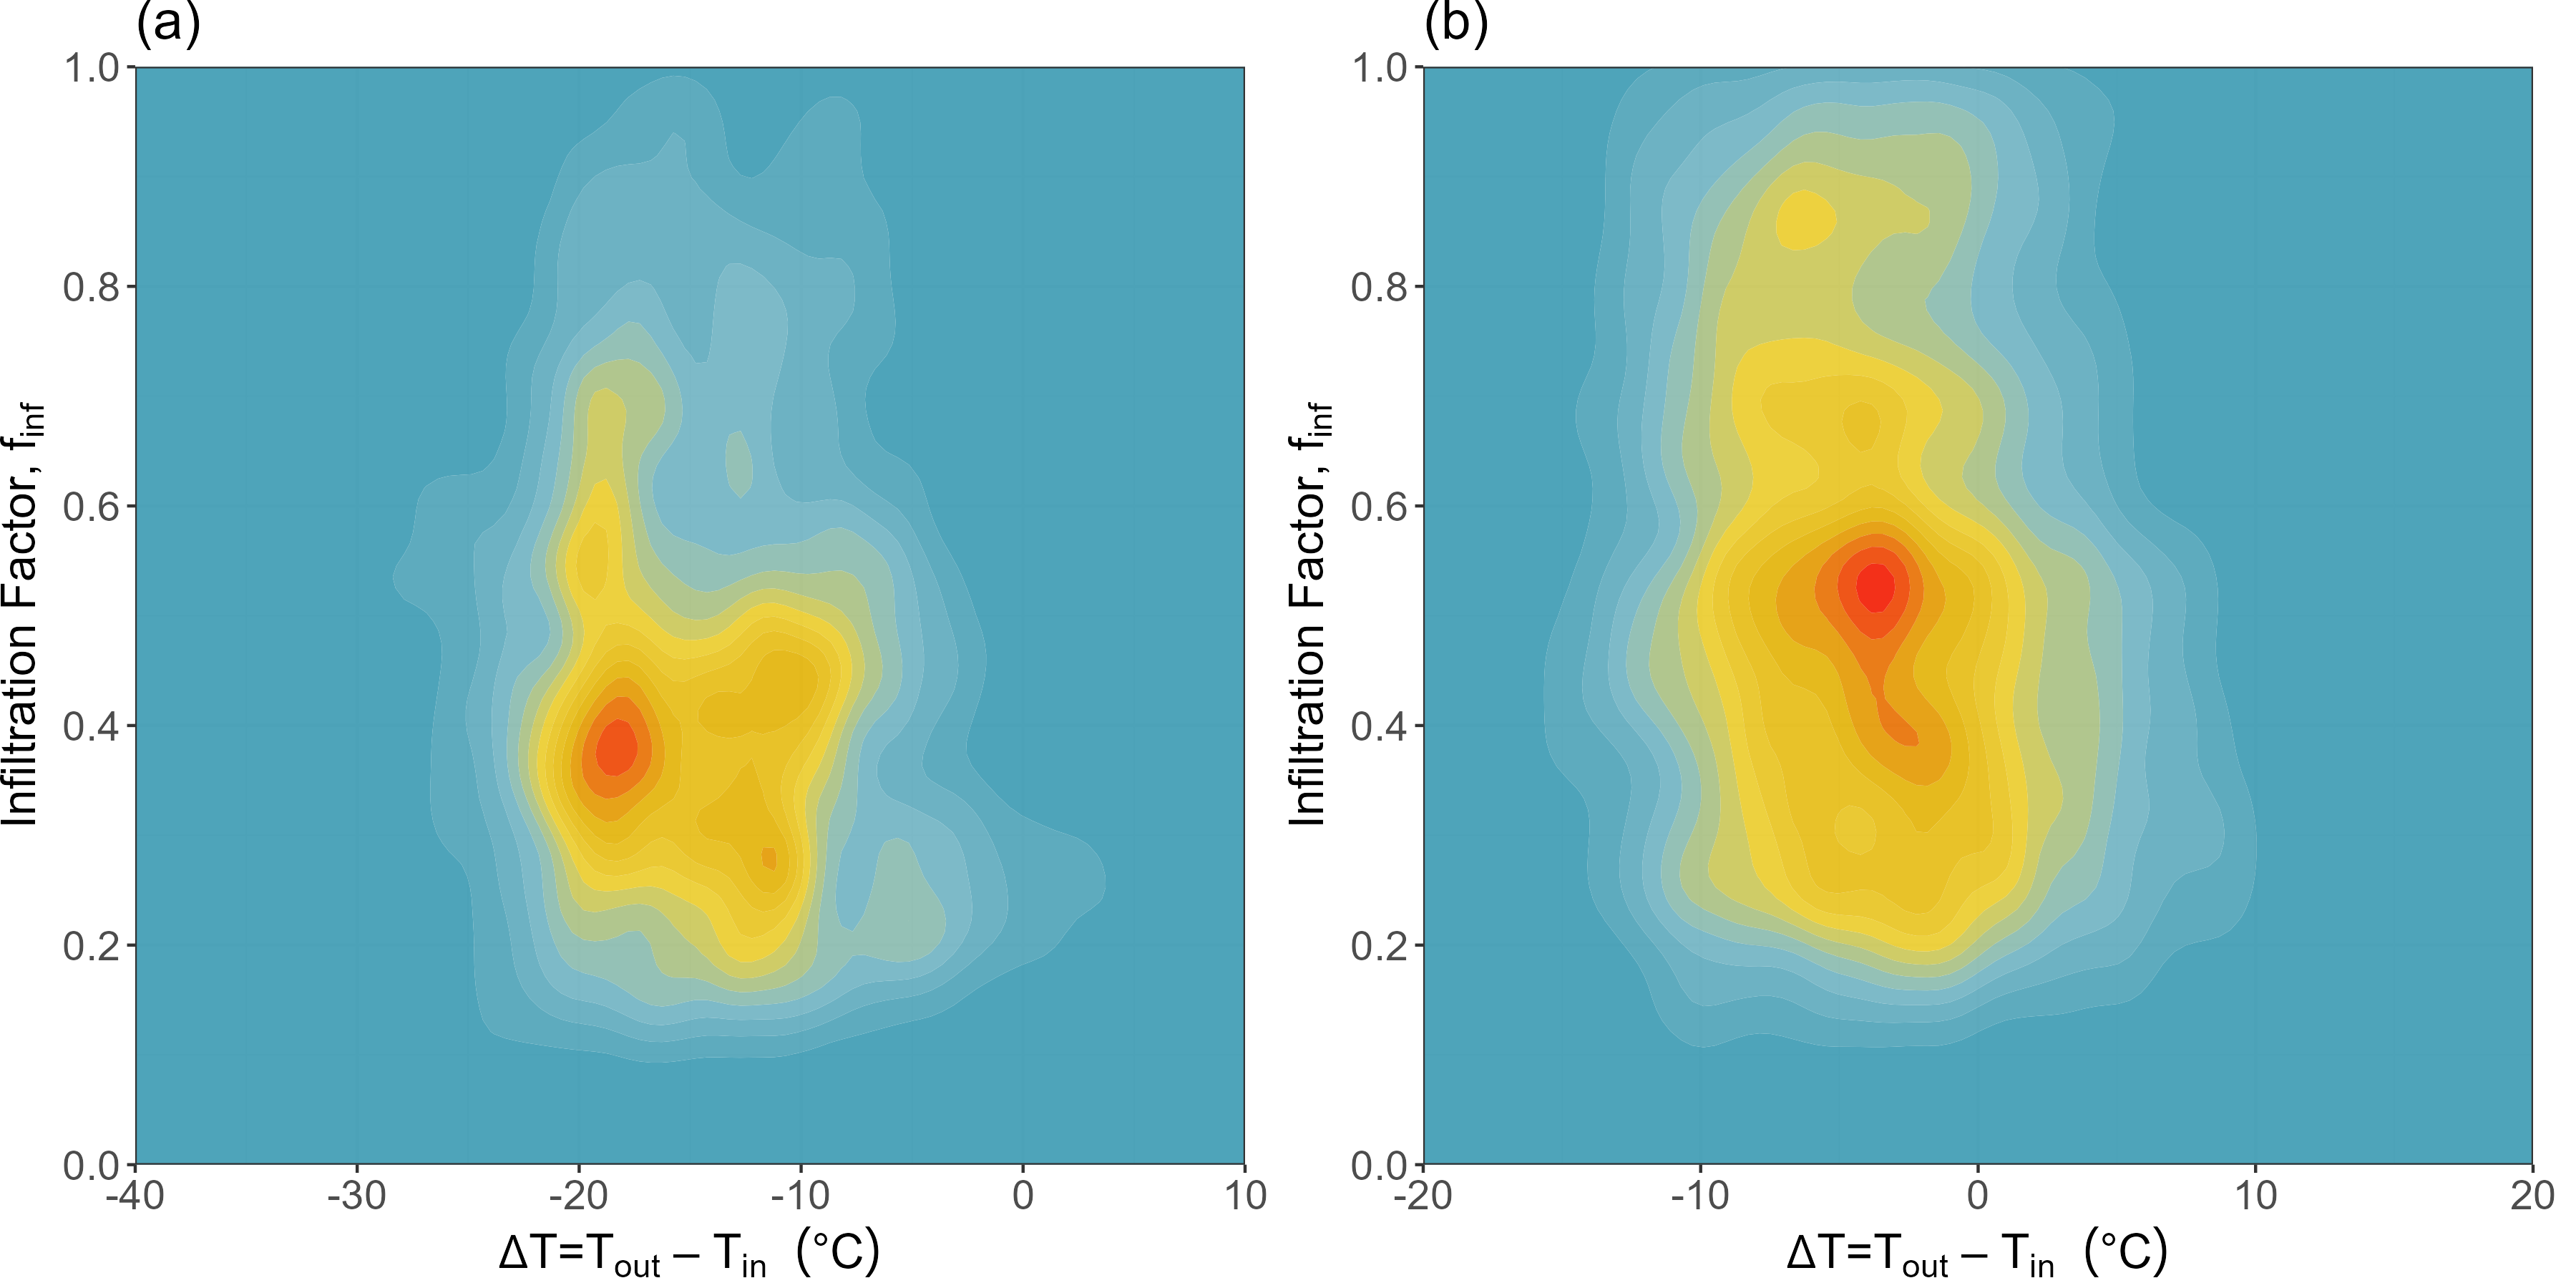
**

**Supplementary Figure 8:** Relationship between the finf and the outdoor/indoor temperature difference for **(a)** ‘household-heating’ (October - April) and **(b)** ‘non-household-heating’ (May – September) periods. The infiltration factor is unitless and the temperature difference is in oC.
