# Supplementary material for: Citizen-Operated Low-Cost Sensors for Estimating Outdoor Particulate Matter Infiltration
Source: Research Square preprint supplement (doi:10.21203/rs.3.rs-4618450/v1), 2024-07-24
Supplement: Supplementary file 2 [file d32ac9e4ed41f46389a716cd.docx]

**Appendix A**

**Table A1.** Summary statistics for indoor and outdoor PM2.5 and the infiltration factor finf for air quality sensors in Legionowo. The PM2.5 concentrations (Cin and Cout) are in µg m–3 and finf is unitless. The statistics were calculated when both indoor and outdoor PM2.5 values were available. The number of measurements n is in hours. SD is the standard deviation and IQR=Q75% – Q25% is the interquartile range with Qx% the quantile at x%.

| **Sensor ID** | **Building type** | **Ventilation type** | **Parameters** | **Summary Statistics** | | | | | |
| --- | --- | --- | --- | --- | --- | --- | --- | --- | --- |
|  |  |  |  | **Q10%** | **Median** | **Mean** | **Q90%** | **IQR** | **SD** |
| 5165  n = 426 | Kindergarten | Natural | Cin | 0.2 | 1.9 | 2.9 | 7.2 | 3.8 | 2.6 |
| Cout | 1.6 | 6.7 | 9.9 | 21.9 | 10.6 | 9.1 |
| finf | 0.13 | 0.3 | 0.29 | 0.47 | 0.22 | 0.13 |
| 5189  n = 4770 | Residential | Mechanical | Cin | 0.8 | 3.5 | 5.8 | 12.2 | 5.1 | 8 |
| Cout | 3.3 | 12.3 | 15.8 | 28,4 | 13.6 | 16.6 |
| finf | 0.16 | 0.26 | 0.29 | 0.46 | 0.17 | 0.12 |
| 5351  n = 8689 | Residential | Natural | Cin | 4.5 | 17.3 | 21.0 | 40.5 | 19.0 | 17.7 |
| Cout | 4.3 | 19.7 | 25.0 | 51.0 | 21.5 | 23.9 |
| finf | 0.56 | 0.77 | 0.75 | 0.95 | 0.22 | 0.15 |
| 5377  n = 2430 | Kindergarten | Natural | Cin | 1.5 | 4.7 | 6.0 | 11.8 | 6.2 | 4.8 |
| Cout | 2.5 | 9.1 | 10.2 | 19.7 | 10.3 | 6.6 |
| finf | 0.33 | 0.52 | 0.53 | 0.72 | 0.22 | 0.15 |
| 5485  n = 5981 | Residential | Natural | Cin | 2.8 | 8.8 | 10.7 | 21.1 | 9.5 | 8.1 |
| Cout | 6.3 | 21.2 | 23.0 | 41.1 | 18.2 | 14.8 |
| finf | 0.28 | 0.41 | 0.43 | 0.6 | 0.15 | 0.13 |
| 5736  n = 3282 | Residential | Natural | Cin | 2.7 | 7.4 | 16.7 | 30.5 | 9.3 | 34.7 |
| Cout | 3.2 | 10.2 | 12.6 | 23.6 | 12.0 | 9.6 |
| finf | 0.43 | 0.62 | 0.64 | 0.86 | 0.25 | 0.16 |
| 6030  n = 915 | Kindergarten | Natural | Cin | 4.7 | 12.8 | 15.6 | 30.7 | 14.7 | 11.5 |
| Cout | 16.2 | 27.9 | 29.4 | 43.3 | 14.3 | 11.8 |
| finf | 0.19 | 0.44 | 0.43 | 0.59 | 0.21 | 0.15 |
| 6032  n = 1565 | Residential | Natural | Cin | 2.5 | 7.2 | 9.2 | 18.2 | 7.9 | 7.5 |
| Cout | 2.9 | 12.2 | 14.9 | 28.2 | 13.9 | 13.3 |
| finf | 0.39 | 0.54 | 0.55 | 0.74 | 0.20 | 0.14 |
| 6033  n = 5206 | Residential | Natural | Cin | 1.8 | 4.8 | 8.6 | 18.6 | 5.7 | 13.6 |
| Cout | 5.0 | 15.7 | 17.9 | 33.1 | 16.3 | 12.1 |
| finf | 0.20 | 0.32 | 0.34 | 0.51 | 0.16 | 0.13 |
